# Supplementary material
Source: PubMed Central journal article supplement (PMC3526806)
Supplement: NIHMS427846-supplement-01.pdf [file NIHMS427846-supplement-01.pdf]

**eTable 1.** Selected Literature for Patients with Favorable Risk Hodgkin Lymphoma Treated with Chemotherapy with or without Radiotherapy

| Reference                 | Stage                                       | Chemotherapy                       | n   | Radiation<br>(in Gy) | EFS<br>(%) | 95% CI   | OS<br>(%) | 95% CI   | Timing<br>(in years) |
|---------------------------|---------------------------------------------|------------------------------------|-----|----------------------|------------|----------|-----------|----------|----------------------|
| CCG 5942 <sup>30</sup>    | I and IIA <sup>a</sup>                      | 4 x COPP / ABVD                    | 109 | (CR) 21              | 100        | --       | 100       | --       | 3                    |
|                           |                                             |                                    | 106 | (CR) ---             | 89         | 82 - 96  | 100       | --       |                      |
| POG 8625 <sup>9</sup>     | IA, IIA, and IIIA <sub>1</sub> <sup>b</sup> | 2 x MOPP / ABVD<br>3 x MOPP / ABVD | 81  | (CR) 25.5            | 91         | 82 - 100 | 97        | 92 - 100 | 8                    |
|                           |                                             |                                    | 78  | (CR) ---             | 83         | 71 - 94  | 94        | 86 - 100 |                      |
| GPOH-HD 95 <sup>4</sup>   | I and IIA <sup>c</sup>                      | 2 x O(E/P)PA                       | 281 | (<CR) 20             | 94         | --       | 97        | --       | 5                    |
|                           |                                             |                                    | 113 | (CR) ---             | 97         | --       | --        | --       |                      |
| GPOH-HD 2002 <sup>5</sup> | I and IIA <sup>c</sup>                      | 2 x O(E/P)PA                       | 133 | (<CR) 20             | 93         | 88 - 97  | 99        | 98 - 100 | 5                    |
|                           |                                             |                                    | 62  | (CR) ---             | 93         | 87 - 100 | --        | --       |                      |
| MSKCC <sup>36</sup>       | I,II and IIIA <sup>d</sup>                  | 6 x ABVD                           | 76  | 36                   | 86         | 78- 95   | 97        | --       | 5                    |
|                           |                                             |                                    | 76  | ---                  | 81         | 72 - 92  | 90        | --       |                      |
| VAMP – (current)          | IA and IIA <sup>e</sup>                     | 4 x VAMP                           | 41  | (<CR) 25.5           | 88         | 76 – 99  | 100       | --       | 5                    |
|                           |                                             |                                    | 47  | (CR) ---             | 89         | 79 - 100 | --        | --       |                      |

Abbreviations: CCG, Children's Oncology Group; POG, Pediatric Oncology Group; GPOH-HD, German Pediatric Oncology/Hematology Hodgkin Disease; MSKCC, Memorial-Sloan-Kettering Cancer Center; VAMP, vinblastine, Adriamycin, methotrexate, and prednisone; COPP, cyclophosphamide, vincristine, procarbazine, and prednisone; ABVD, Adriamycin, bleomycin, vinblastine, and dacarbazine; O(E/P)PA; vincristine, etoposide, procarbazine, prednisone, and Adriamycin; CR, complete response; EFS, event-free survival; OS, overall survival; CI, confidence interval (these were calculated from given standard errors in the CCG 5942, POG 8625, and GPOH-HD 2002 – there was no standard error or CI given in the GPOH-HD 95 study);

<sup>a</sup>No hilar adenopathy, > 4 nodal groups, mediastinal to thoracic ratio > 33%, or peripheral nodal aggregate  $\geq$  10 cm.

<sup>b</sup>Subdiaphragmatic disease confined to the upper abdomen only.

<sup>c</sup>No extranodal extension.

<sup>d</sup>No mediastinal to thoracic ratio > 33%, or peripheral nodal aggregate  $\geq$  10 cm.

<sup>e</sup>No extranodal extension, > 2 nodal groups, or mediastinal to thoracic ratio > 33%.

#### Radiotherapy assignment in the different studies:

- In the CCG 5942 trial patients who achieved complete remission to chemotherapy were randomized to low dose radiotherapy or no radiotherapy.
- In the POG 8625 trial patients in complete remission after 2 cycles of MOPP/ABVD were randomized to either another cycle of MOPP/ABVD or radiotherapy.
- In studies GPOH-HD 95, GPOH-HD 2002, radiotherapy was based on response to chemotherapy: patients achieving a complete response at the end of chemotherapy did not receive radiotherapy, only if the response was less than complete.

- In the MSKCC study patients were randomized at enrollment to receive or not receive radiotherapy at the end of chemotherapy.
- In the current study radiotherapy assignment was determined on early response evaluation after 2 cycles of chemotherapy. Patients achieving a complete response did not receive radiotherapy and patients achieving less than a complete response received low dose radiotherapy.
